# Supplementary material
Source: PubMed Central journal article supplement (PMC6450704)
Supplement: NIHMS1518919-supplement-13524_2018_754_MOESM1_ESM.pdf [file NIHMS1518919-supplement-13524_2018_754_MOESM1_ESM.pdf]

## Online appendix

Hayford, Sarah R. and Victor Agadjanian. "Spacing, Stopping, or Postponing? Fertility Desires in a Sub-Saharan Setting." *Demography*.

Contact author: Sarah Hayford, [hayford.10@osu.edu](mailto:hayford.10@osu.edu)

### Section 1: Sample characteristics

Table A1.1. Individual and household characteristics at Wave 2

|                                           | Percent in category or mean (SD) |
|-------------------------------------------|----------------------------------|
| Number of living children                 | 3.1 (1.7)                        |
| Age of youngest living child (years)      |                                  |
| <2                                        | 37.1                             |
| 2-4                                       | 39.6                             |
| 5-9                                       | 13.5                             |
| 10+ /no living children                   | 9.8                              |
| Age (years)                               |                                  |
| <24                                       | 19.6                             |
| 25-29                                     | 29.2                             |
| 30-34                                     | 26.0                             |
| 35-39                                     | 15.4                             |
| 40 and over                               | 9.8                              |
| Marital status                            |                                  |
| Not married                               | 7.7                              |
| Married to non-migrant                    | 61.2                             |
| Married to successful migrant             | 22.3                             |
| Married to unsuccessful migrant           | 16.4                             |
| Education and economic resources          |                                  |
| No formal schooling                       | 27.4                             |
| 1-4 years of schooling                    | 43.4                             |
| 5 or more years of schooling              | 29.2                             |
| Household wealth index (range: 1-4)       | 2.0 (1.0)                        |
| Household owns cattle                     | 32.5                             |
| Days in past week ate meat, chicken, fish | 1.7 (1.7)                        |
| Health                                    |                                  |
| Very worried about HIV                    | 48.3                             |
| Good self-rated health (vs. poor/so-so)   | 75.6                             |
| N                                         | 1785                             |

Women interviewed in the second wave with nonmissing data on dependent and independent variables included in models predicting fertility desires (Table 3).

Table A1.2. Between-wave changes in individual and household characteristics

|                                           | % experiencing change<br>or mean change,<br>Wave 2 – Wave 3 |
|-------------------------------------------|-------------------------------------------------------------|
| Demographic characteristics               |                                                             |
| Birth between waves/pregnant at interview | 51.7                                                        |
| Child death (%)                           | 4.2                                                         |
| Marital dissolution (%)                   | 7                                                           |
| New marriage (%)                          | 1.2                                                         |
| Change in husband's migration status      |                                                             |
| To successful migrant (%)                 | 9.4                                                         |
| To unsuccessful migrant (%)               | 10.4                                                        |
| Returned migrant (%)                      | 18.2                                                        |
| Change in health                          |                                                             |
| More worried about HIV (%)                | 17.3                                                        |
| Less worried about HIV (%)                | 31.2                                                        |
| Better self-rated health (%)              | 15                                                          |
| Worse self-rated health (%)               | 15.4                                                        |
| Change in economic conditions             |                                                             |
| Subjective relative improvement (%)       | 16.9                                                        |
| Subjective relative worsening (%)         | 12.8                                                        |
| New cattle ownership (%)                  | 8.2                                                         |
| Loss of cattle ownership (%)              | 5.7                                                         |
| Days ate meat, chicken, or fish (mean)    | 0.61                                                        |
| N                                         | 1519                                                        |

Women interviewed in two adjacent waves of data collection with nonmissing data on dependent and independent variables included in models predicting changes in fertility desires (Table 5).

## Section 2: Supplementary longitudinal analysis

Table A2.1. Multinomial logistic regression predicting desires at Wave 2 from desires at Wave 1 and between-wave changes in individual and household characteristics

|                                           | Later vs. soon |      |     | Later vs. stop |      |     |
|-------------------------------------------|----------------|------|-----|----------------|------|-----|
|                                           |                |      |     |                |      |     |
| Intercept                                 | -2.19          | 0.30 | *** | 1.35           | 0.32 | *** |
| Characteristics in previous wave          |                |      |     |                |      |     |
| Number of living children                 | 0.19           | 0.07 | **  | -0.36          | 0.06 | *** |
| Age 25 and under (ref.)                   |                |      |     |                |      |     |
| Age 26-30                                 | 0.03           | 0.20 |     | -0.22          | 0.20 |     |
| Age 31 and older                          | 0.27           | 0.25 |     | -0.53          | 0.23 | *   |
| No formal schooling (ref.)                |                |      |     |                |      |     |
| 1-4 years of schooling                    | 0.00           | 0.19 |     | -0.17          | 0.19 |     |
| 5 or more years of schooling              | -0.12          | 0.21 |     | -0.23          | 0.21 |     |
| Desires in previous wave                  |                |      |     |                |      |     |
| Want to have a child soon (ref.)          |                |      |     |                |      |     |
| Want to delay                             | 0.43           | 0.18 | *   | -0.01          | 0.18 |     |
| Want to stop                              | 0.35           | 0.25 |     | -1.11          | 0.22 | *** |
| Demographic change                        |                |      |     |                |      |     |
| Birth between waves/pregnant at interview | 1.71           | 0.20 | *** | -0.26          | 0.21 |     |
| Child death                               | -0.17          | 0.29 |     | 0.33           | 0.30 |     |
| Marital dissolution                       | 0.87           | 0.29 | **  | -0.46          | 0.26 | +   |
| Change in husband's migration status      |                |      |     |                |      |     |
| To successful migrant                     | -0.37          | 0.24 |     | 0.14           | 0.26 |     |
| To unsuccessful migrant                   | 0.11           | 0.25 |     | 0.01           | 0.25 |     |
| Returned migrant                          | -0.32          | 0.22 |     | -0.08          | 0.22 |     |
| Change in health                          |                |      |     |                |      |     |
| More worried about HIV                    | 0.38           | 0.28 |     | -0.02          | 0.27 |     |
| Less worried about HIV                    | -0.02          | 0.17 |     | -0.14          | 0.16 |     |
| Change in economic conditions             |                |      |     |                |      |     |
| New cattle ownership                      | 0.18           | 0.25 |     | 0.16           | 0.25 |     |
| Loss of cattle ownership                  | 0.15           | 0.30 |     | -0.22          | 0.28 |     |
| -2 log likelihood                         |                |      |     | 2345           |      |     |

Women interviewed in Waves 1 and 2 with nonmissing data on all measures. N=1355. For measures of between-wave changes, reference category is no change. +: p<.10; \*: p<.05; \*\*: p<.01; \*\*\*: p<.001.

Table A2.2. Multinomial logistic regression predicting desires at Wave 3 from desires at Wave 2 and between-wave changes in individual and household characteristics

|                                           | Later vs. soon |      |      | Later vs. stop |      |     |
|-------------------------------------------|----------------|------|------|----------------|------|-----|
| Intercept                                 | -2.38          | 0.30 | ***  | 1.83           | 0.32 | *** |
| Characteristics in previous wave          |                |      |      |                |      |     |
| Number of living children                 | 0.24           | 0.07 | ***  | -0.42          | 0.06 | *** |
| Age 25 and under (ref.)                   |                |      |      |                |      |     |
| Age 26-30                                 | 0.03           | 0.20 |      | -0.51          | 0.20 | *   |
| Age 31 and older                          | -0.34          | 0.23 |      | -1.05          | 0.23 | *** |
| No formal schooling (ref.)                |                |      |      |                |      |     |
| 1-4 years of schooling                    | 0.21           | 0.20 |      | -0.27          | 0.19 |     |
| 5 or more years of schooling              | 0.43           | 0.22 | *    | -0.37          | 0.21 | +   |
| Desires in previous wave                  |                |      |      |                |      |     |
| Want to have a child soon (ref.)          |                |      |      |                |      |     |
| Want to delay                             | 0.40           | 0.19 | *    | -0.37          | 0.19 | +   |
| Want to stop                              | 0.74           | 0.22 | ***  | -1.12          | 0.19 | *** |
| Demographic change                        |                |      |      |                |      |     |
| Birth between waves/pregnant at interview | 1.62           | 0.17 | ***  | -0.06          | 0.17 |     |
| Child death                               | -0.65          | 0.37 | +    | 0.59           | 0.40 |     |
| Marital dissolution                       | 1.41           | 0.36 | ***  | -0.03          | 0.29 |     |
| New marriage                              | 0.13           | 0.65 |      | 0.41           | 0.67 |     |
| Change in husband's migration status      |                |      |      |                |      |     |
| To successful migrant                     | -0.55          | 0.27 | *    | -0.03          | 0.27 |     |
| To unsuccessful migrant                   | -0.14          | 0.25 |      | 0.22           | 0.25 |     |
| Returned migrant                          | -0.08          | 0.21 |      | -0.17          | 0.20 |     |
| Change in health                          |                |      |      |                |      |     |
| More worried about HIV                    | 0.04           | 0.22 |      | 0.20           | 0.21 |     |
| Less worried about HIV                    | 0.27           | 0.18 |      | 0.22           | 0.17 |     |
| Change in economic conditions             |                |      |      |                |      |     |
| New cattle ownership                      | 0.06           | 0.29 |      | 0.16           | 0.27 |     |
| Loss of cattle ownership                  | 0.75           | 0.34 | *    | 0.32           | 0.29 |     |
| -2 log likelihood                         |                |      | 2417 |                |      |     |

Women interviewed in Waves 2 and 3 with nonmissing data on all measures. N=1547. For measures of between-wave changes, reference category is no change. +: p<.10; \*: p<.05; \*\*: p<.01; \*\*\*: p<.001.

Table A2.3: Between-wave changes in individual and household characteristics included in supplementary models

|                                           | % experiencing change,<br>Wave 1 – Wave 2 | % experiencing change,<br>Wave 2 – Wave 3 |
|-------------------------------------------|-------------------------------------------|-------------------------------------------|
| Demographic characteristics               |                                           |                                           |
| Birth between waves/pregnant at interview | 71.4                                      | 51.3                                      |
| Child death                               | 6.9                                       | 4.1                                       |
| Marital dissolution                       | 10.4                                      | 6.9                                       |
| New marriage                              | --                                        | 1.2                                       |
| Change in husband's migration status      |                                           |                                           |
| To successful migrant                     | 11.5                                      | 9.5                                       |
| To unsuccessful migrant                   | 11.2                                      | 10.3                                      |
| Returned migrant                          | 16.0                                      | 18.3                                      |
| Change in worry about HIV                 |                                           |                                           |
| More worried                              | 8.7                                       | 17.3                                      |
| Less worried                              | 41.6                                      | 31.5                                      |
| Change in economic conditions             |                                           |                                           |
| New cattle ownership                      | 10.5                                      | 8.3                                       |
| Loss of cattle ownership                  | 7.9                                       | 5.7                                       |
| N                                         | 1355                                      | 1547                                      |

Women interviewed in two adjacent waves of data collection with non-missing data on all measures included in models predicting changes in fertility desires (Tables A2.1, A2.2).
